# Supplementary material for: Bone morphogenetic protein 2 (BMP2) induces growth suppression and enhances chemosensitivity of human colon cancer cells
Source: Springer Nature journal article supplement (doi:10.1186/s12935-016-0355-9), 2016-09-29
Supplement: MOESM3 [file 10791952]

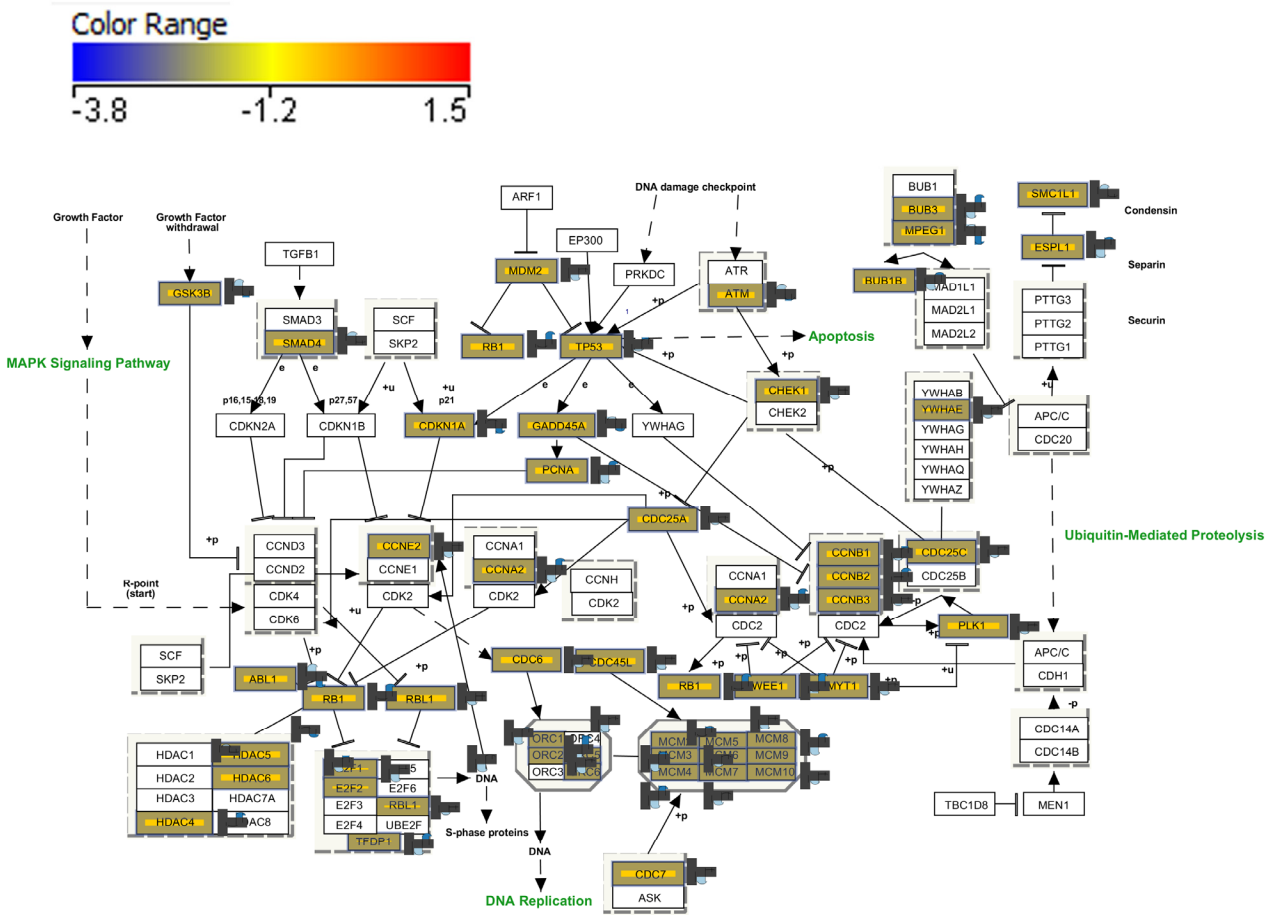

Supplementary Figure 2. Illustration of the cell cycle pathway
