# Supplementary material for: Bone morphogenetic protein 2 (BMP2) induces growth suppression and enhances chemosensitivity of human colon cancer cells
Source: Springer Nature journal article supplement (doi:10.1186/s12935-016-0355-9), 2016-09-29
Supplement: MOESM4 [file 10791952]

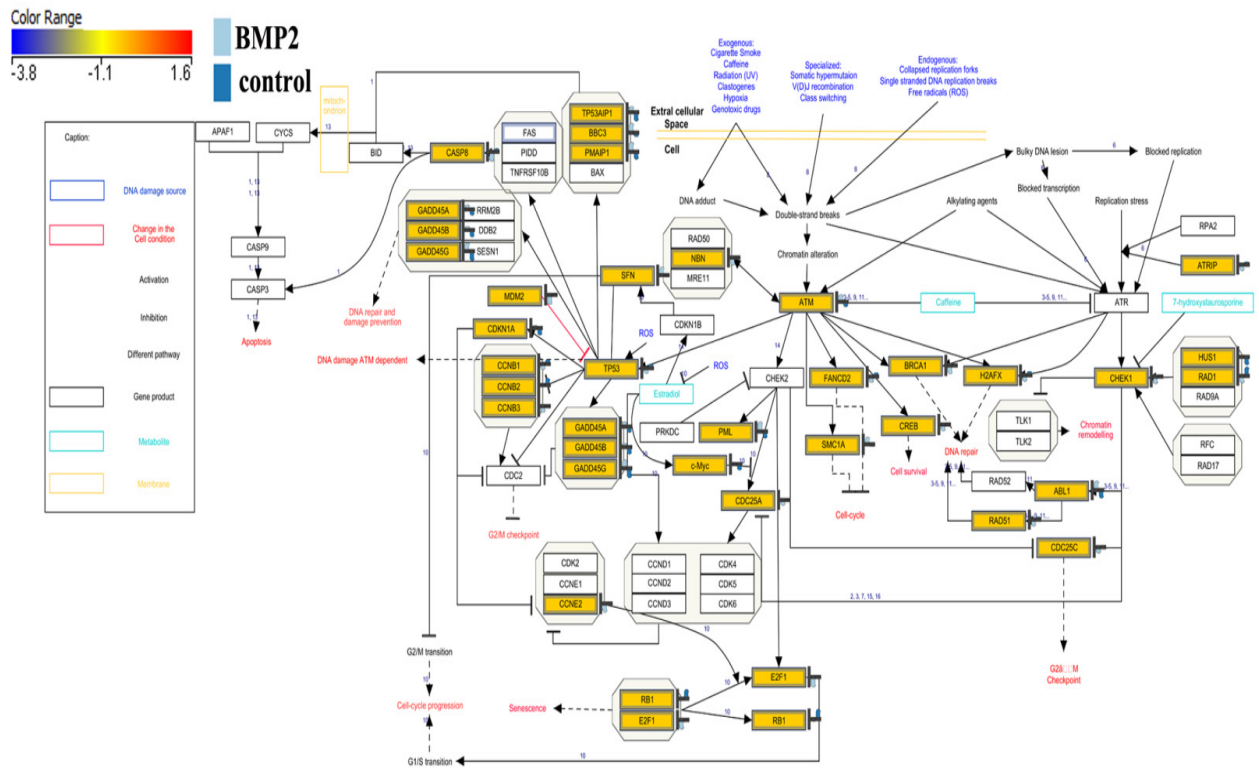

**Supplementary Figure 3. Illustration of the DNA damage response pathway based on microarray data with matched entities highlighted.**
