# Supplementary material for: Bone morphogenetic protein 2 (BMP2) induces growth suppression and enhances chemosensitivity of human colon cancer cells
Source: Springer Nature journal article supplement (doi:10.1186/s12935-016-0355-9), 2016-09-29
Supplement: MOESM5 [file 10791952]

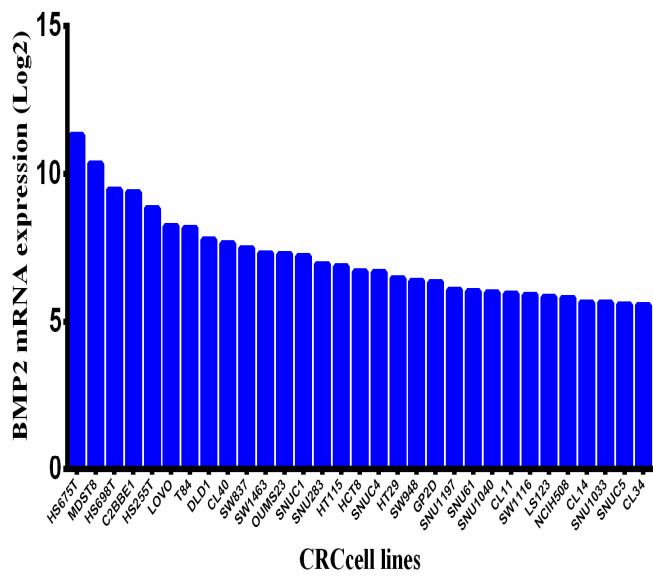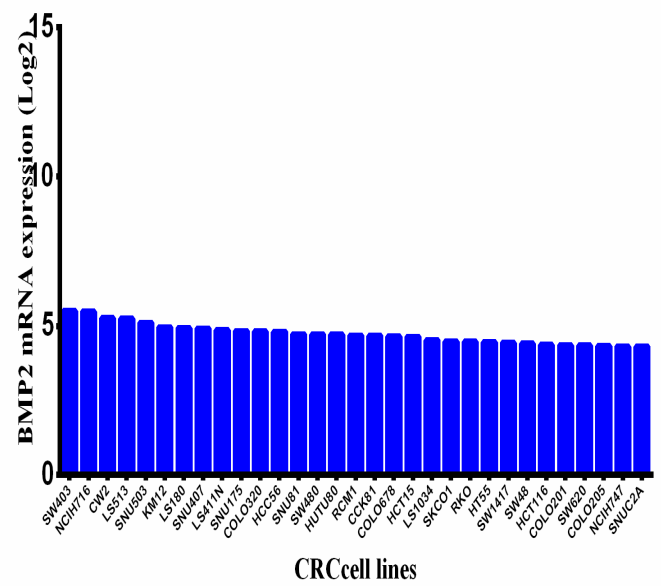

**Supplementary figure 4. BMP2 expression in CRC cell lines from the Cancer Cell Line Encyclopedia. Data are presented as mRNA expression (Log2).**
